# Supplementary material for: The Amylolytic Regulator AmyR of Aspergillus niger Is Involved in Sucrose and Inulin Utilization in a Culture-Condition-Dependent Manner
Source: MDPI journal article supplement (doi:10.3390/jof9040438), 2023-04-04
Supplement: s1 [file s1]

## Supplementary material

### Title

The amylolytic regulator AmyR of *Aspergillus niger* is involved in sucrose and inulin utilization in a culture condition-dependent manner

### Authors

Roland S. Kun<sup>1</sup>, Sonia Salazar-Cerezo<sup>1</sup>, Mao Peng<sup>1</sup>, Yu Zhang<sup>2</sup>, Emily Savage<sup>2</sup>, Anna Lipzen<sup>2</sup>, Vivian Ng<sup>2</sup>, Igor V. Grigoriev<sup>2,3</sup>, Ronald P. de Vries<sup>1,\*</sup> and Sandra Garrigues<sup>1,\*,†</sup>

### Affiliations

<sup>1</sup> Fungal Physiology, Westerdijk Fungal Biodiversity Institute & Fungal Molecular Physiology, Utrecht University, Uppsalalaan 8, 3584 CT Utrecht, The Netherlands

<sup>2</sup> USA Department of Energy Joint Genome Institute, Lawrence Berkeley National Laboratory, 1 Cyclotron Rd, Berkeley, CA 94720, United States

<sup>3</sup> Department of Plant and Microbial Biology, University of California Berkeley, Berkeley, CA 94720, United States

<sup>†</sup> Current address: Food Biotechnology Department, Instituto de Agroquímica y Tecnología de Alimentos (IATA), Consejo Superior de Investigaciones Científicas (CSIC), Catedrático Agustín Escardino Benlloch 7, 46980 Paterna, Valencia, Spain

\* Correspondence: Ronald P. de Vries: r.devries@wi.knaw.nl and Sandra Garrigues: sgarrigues@iata.csic.es

### Table of contents

**Supplementary Figure S1.** Protein production analysis of *A. niger* parental,  $\Delta amyR$ ,  $\Delta inuR$  and  $\Delta amyR \Delta inuR$  strains.

**Supplementary Figure S2.** Hierarchical clustering of transcription factor genes in *A. niger* control (CBS 138852) and  $\Delta amyR$ ,  $\Delta inuR$  and  $\Delta amyR \Delta inuR$  deletion mutants.

**Supplementary Table S1.** *A. niger* strains used in this study.

**Supplementary Table S2.** Primers used in this study.

**Supplementary Table S3.** Expression levels of two major  $\alpha$ -glucosidase genes, *agdA* and *agdB*, in the *A. niger* control (CBS 138852) and  $\Delta amyR$ ,  $\Delta inuR$  and  $\Delta amyR \Delta inuR$  deletion strains cultivated on solid media containing 1% sucrose or inulin as carbon source.

**Supplementary Figure S1:** Protein production analysis of *A. niger* parental,  $\Delta amyR$ ,  $\Delta inuR$  and  $\Delta amyR \Delta inuR$  strains. SDS-PAGE analysis of the cell-free supernatants after 4, 8, 24 and 32 h of growth on MM + 1% inulin. Ten  $\mu$ L of supernatant were loaded per well. Three biological samples are shown per strain. M: PageRuler™ Plus Prestained Protein Ladder (Thermo Scientific).

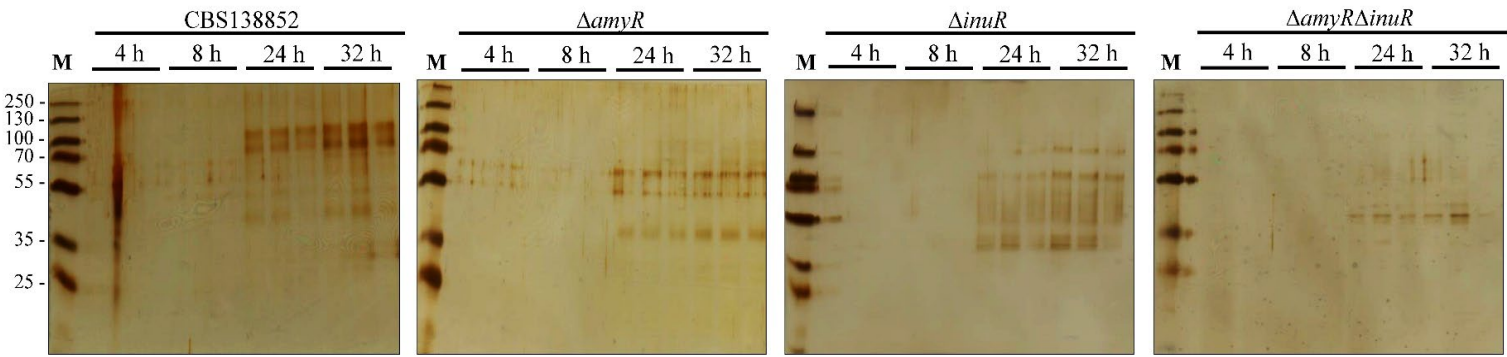

**Supplementary Figure S2:** Hierarchical clustering of transcription factor genes in *A. niger* control (CBS 138852) and  $\Delta amyR$ ,  $\Delta inuR$  and  $\Delta amyR\Delta inuR$  deletion mutants. Data originated from 2 and 8 h of culturing in 1% sucrose (**A**) or 1% inulin (**B**) liquid minimal medium. Downregulated genes (fold change < 0.5;  $p_{adj} < 0.01$ ) in the deletion mutants compared to the control are indicated by a downward arrow. Upregulated genes (fold change > 2;  $p_{adj} < 0.01$ ) are indicated by an upward arrow. The analyzed genes include the genes encoding the carbon catabolite repressor CreA, the (hemi-)cellulolytic regulators ClrA and ClrB, the xylanolytic regulator XlnR, the arabinanolytic regulator AraR, the amylolytic regulator AmyR, the inulinolytic regulator InuR, the regulator of L-rhamnose utilization RhaR, the regulator of D-galactose utilization GalX and the activator and repressor of D-galacturonic acid utilization GaaR and GaaX, respectively.

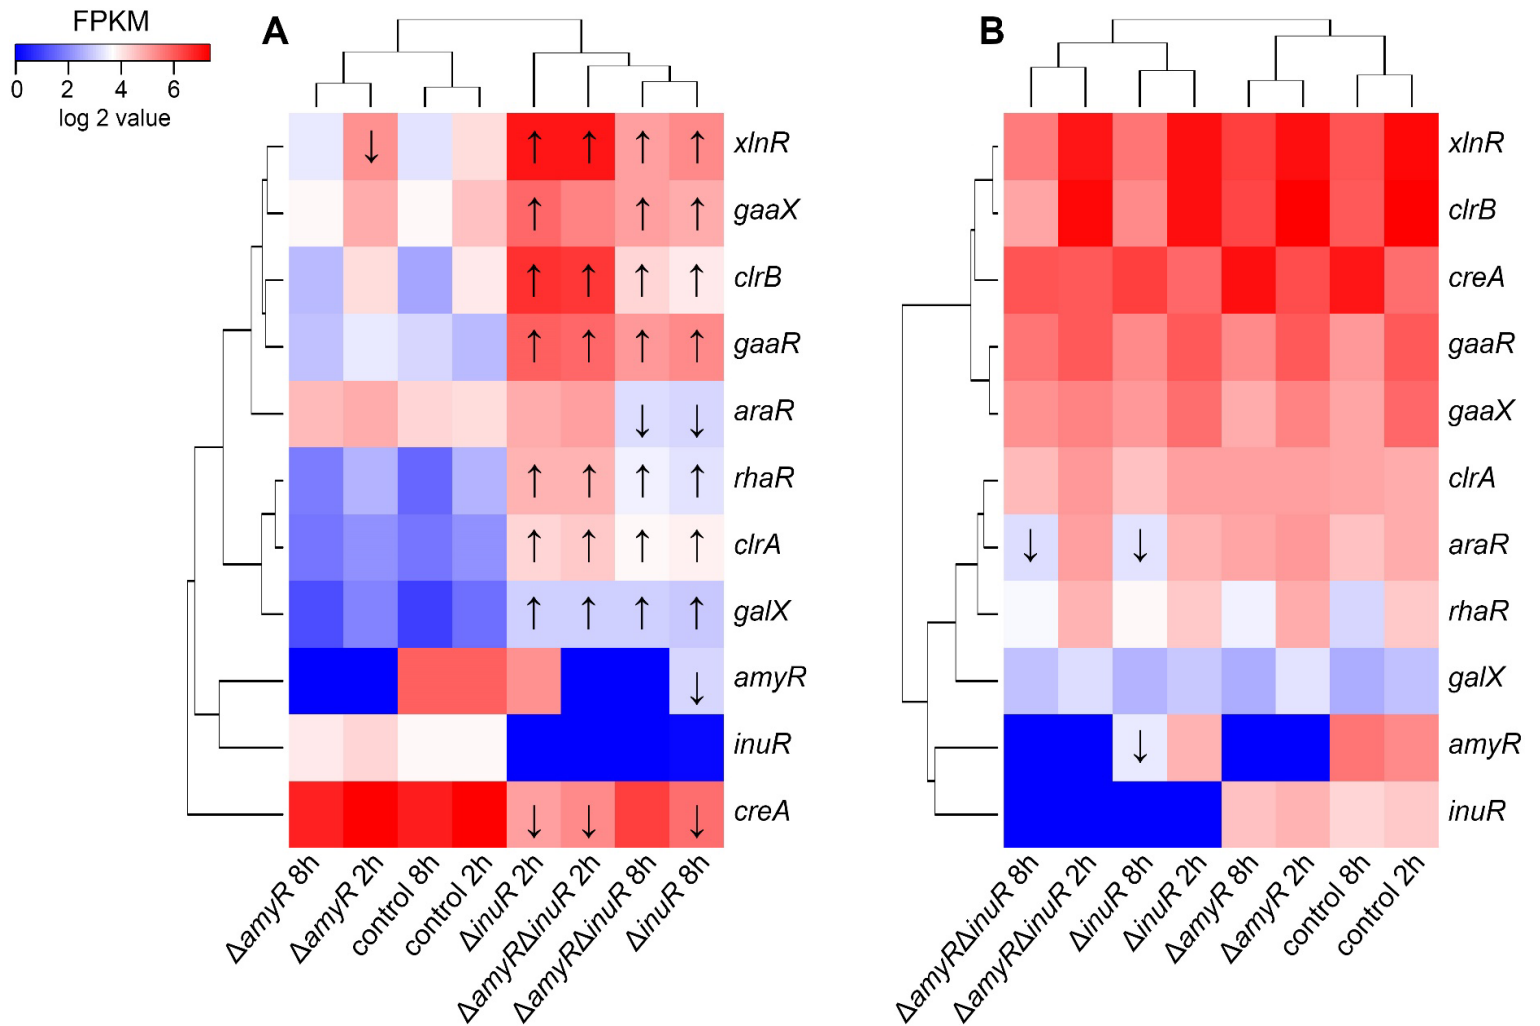

**Supplementary Table S1.** *A. niger* strains used in this study.

| CBS number | Strain description        | Genotype                                                                                    | Reference  |
|------------|---------------------------|---------------------------------------------------------------------------------------------|------------|
| CBS 138852 | N593 $\Delta kusA$        | <i>cspA1</i> , <i>pyrG</i> <sup>-</sup> , <i>kusA::amdS</i>                                 | [1]        |
| CBS 146902 | $\Delta amyR$             | <i>cspA1</i> , <i>pyrG</i> <sup>-</sup> , <i>kusA::amdS</i> , $\Delta amyR$                 | This study |
| CBS 146903 | $\Delta inuR$             | <i>cspA1</i> , <i>pyrG</i> <sup>-</sup> , <i>kusA::amdS</i> , $\Delta inuR$                 | This study |
| CBS 146904 | $\Delta amyR \Delta inuR$ | <i>cspA1</i> , <i>pyrG</i> <sup>-</sup> , <i>kusA::amdS</i> , $\Delta amyR$ , $\Delta inuR$ | This study |

[1] Meyer, V.; Arentshorst, M.; El-Ghezal, A.; Drews, A.C.; Kooistra, R.; van den Hondel, C.A.M.J.J.; Ram, A.F.J. Highly efficient gene targeting in the *Aspergillus niger kusA* mutant. *J. Biotechnol.* **2007**, *128*, 770–775.

**Supplementary Table S2.** Primers used in this study.

| Primer ID               | Use <sup>a</sup> | Sequence (5'→3') <sup>b</sup>                       | Purpose <sup>c</sup> |
|-------------------------|------------------|-----------------------------------------------------|----------------------|
| P1                      | F                | CAACCTCCAATCCAATTTGACTCCGCCGAACGTACTG               | gRNA                 |
| P2                      | R                | ACTACTCTACCACTATTTGAAAAGCAAAAAAGGAAGGTACAAAAAAGC    | gRNA                 |
| P3- <i>amyR</i>         | R                | <b>TGCGATAAGTGTGACGCCT</b> GACGAGCTTACTCGTTTCG      | gRNA                 |
| P4- <i>amyR</i>         | F                | <b>AGGCGTCGACACTTATCGCAG</b> TTTTAGAGCTAGAAATAGCAAG | gRNA                 |
| P3- <i>inuR</i>         | R                | <b>ACGTCTTCTTCTCGAGCTAAG</b> ACGAGCTTACTCGTTTCG     | gRNA                 |
| P4- <i>inuR</i>         | F                | <b>TTAGCTCGAGAAGAAGACGT</b> TTTTAGAGCTAGAAATAGCAAG  | gRNA                 |
| Fw-screen               | F                | TTTTCTCTTCCATTACGC                                  | cse                  |
| Rev-screen              | R                | GGGGATCATAATAGTACTAGCCA                             | cse                  |
| An- <i>amyR</i> _5F     | F                | TGGGATGTTCCACCACTGTTACG                             | RT, csa              |
| An- <i>amyR</i> _5R     | R                | CGATAGCGAATCCTAGCAGTGCGGAGACAAGTGTGACTCC            | RT                   |
| An- <i>amyR</i> _3F     | F                | ACTGCTAGGATTCGCTATCGCAACTACGACGATGACGATGC           | RT                   |
| An- <i>amyR</i> _3R     | R                | CACCGTGACCCAGAGAAAAGG                               | RT, csa              |
| An- <i>amyR</i> NEST_5F | F                | GAGCCTCAGACTCTGTCAGC                                | RT                   |
| An- <i>amyR</i> NEST_3R | R                | TCCACCACCATCAAAATCACC                               | RT                   |
| An- <i>inuR</i> _5F     | F                | TCGGAGGAGATACGCAAAGC                                | RT, csa              |
| An- <i>inuR</i> _5R     | R                | CGATAGCGAATCCTAGCAGTCTCACGAGTCATAAGCATTGTCG         | RT                   |
| An- <i>inuR</i> _3F     | F                | ACTGCTAGGATTCGCTATCGTGGCGTTCTGGTTTTATCACG           | RT                   |
| An- <i>inuR</i> _3R     | R                | ATTGACGGGCATGAGTGTCC                                | RT, csa              |
| An- <i>inuR</i> NEST_5F | F                | TAAGAACAACGACCCCATCGC                               | RT                   |
| An- <i>inuR</i> NEST_3R | R                | AAGGGAAACCGCCAATCAGC                                | RT                   |

<sup>a</sup> F: forward; R: reverse.

<sup>b</sup> The gRNA sequence is highlighted in bold.

<sup>c</sup> gRNA: guide RNA; RT: Repair Template; cse: colony screening for *E. coli*; csa: colony screening for *A. niger*.

**Supplementary Table S3.** Expression levels of two major α-glucosidase genes, *agdA* and *agdB*, in the *A. niger* control (CBS 138852) and  $\Delta amyR$ ,  $\Delta inuR$  and  $\Delta amyR \Delta inuR$  deletion strains cultivated on solid media containing 1% sucrose or inulin as carbon source. Gene expression values of FPKM < 20 were considered low, and are indicated in red. Upregulated genes (fold change > 2) are indicated in blue, while downregulated genes (fold change < 0.5) are indicated in orange. Statistically significant changes (*p* adj < 0.01) are indicated in bold.

| Gene ID    | Gene name   | Gene expression values (FPKM) |                       |                       |                                   |                |                      |                      |                                  | DeSeq2 fold change compared to the control strain |                       |                                   |                      |                      |                                  |
|------------|-------------|-------------------------------|-----------------------|-----------------------|-----------------------------------|----------------|----------------------|----------------------|----------------------------------|---------------------------------------------------|-----------------------|-----------------------------------|----------------------|----------------------|----------------------------------|
|            |             | Control sucrose               | $\Delta amyR$ sucrose | $\Delta inuR$ sucrose | $\Delta amyR \Delta inuR$ sucrose | Control inulin | $\Delta amyR$ inulin | $\Delta inuR$ inulin | $\Delta amyR \Delta inuR$ inulin | $\Delta amyR$ sucrose                             | $\Delta inuR$ sucrose | $\Delta amyR \Delta inuR$ sucrose | $\Delta amyR$ inulin | $\Delta inuR$ inulin | $\Delta amyR \Delta inuR$ inulin |
| NRRL3_7700 | <i>agdA</i> | 68.855                        | 6.861                 | 302.128               | 15.133                            | 134.737        | 12.070               | 23.460               | 11.342                           | 0.098                                             | 3.813                 | 0.203                             | 0.072                | 0.140                | 0.076                            |
| NRRL3_2524 | <i>agdB</i> | 11.653                        | 4.330                 | 104.419               | 204.384                           | 70.239         | 34.984               | 304.138              | 265.295                          | 0.337                                             | 7.397                 | 14.870                            | 0.394                | 3.472                | 3.195                            |
